# Supplementary material for: Sustainable coatings from bio-based, enzymatically synthesized polyesters with enhanced functionalities
Source: Royal Society of Chemistry journal article supplement (doi:10.1039/c6py01339b), 2016-01-01
Supplement: c6py01339b1.pdf [file c6py01339b1.pdf]

## Electronic Supporting Information

# Sustainable coatings from bio-based, enzymatically synthesized polyesters with enhanced functionalities

Liliana Gustini <sup>a,b</sup>, Cristina Lavilla <sup>a,\*</sup>, Lasse Finzel <sup>a</sup>, Bart A.J. Noordover <sup>a</sup>, Marco M.R.M. Hendrix <sup>a</sup>, Cor E. Koning <sup>a,c</sup>

<sup>a</sup> *Laboratory of Polymer Materials, Eindhoven University of Technology, P.O. Box 513, 5600 MB Eindhoven, the Netherlands*

<sup>b</sup> *Dutch Polymer Institute, P.O. Box 902, 5600 AX Eindhoven, The Netherlands*

<sup>c</sup> *DSM Coating Resins, Ceintuurbaan 5, Zwolle, The Netherlands*

\*corresponding author: Cristina Lavilla, C.LavillaAguilar@tue.nl

**Potentiometric titration.** For the AV determination, in a round flask approximately 0.5 g of the sample were precisely weighed and dissolved in ca. 30 mL tetrahydrofuran (THF) and ca. 7 mL methanol. The titration was performed with a 0.1 M KOH-solution in methanol with a Metrohm Titrino plus 848 fitted with a silver titrode.

The AV is defined as the number of milligrams of potassium hydroxide (KOH) required to neutralize 1 g of polymer resin.

$$AV = \frac{V_s * N * 56.1}{W_s}$$

In this equation AV = acid value (mg KOH/g),  $V_s$  = volume of methanolic KOH solution needed to titrate the sample (mL), N = normality of KOH solution (mol/L), 56.1 = molar mass of KOH (g/mol) and  $W_s$  = sample weight (g).

OHV determination was performed by dissolving approximately 0.5 g of the sample in ca. 30 mL tetrahydrofuran (THF). To this solution, 15 mL of 4-(dimethylamino)pyridine solution (10 g in 1 L THF) and exactly 5 mL of ca. 1.05 M acetic anhydride in THF were added and the mixture was stirred for 50 min. The reaction solution was then hydrolyzed with 10 mL of a solution containing 20 vol% water and 80 vol% THF.

For the titration, a Metrohm Titrino Plus 848 fitted with a silver titrode and a 0.5 M KOH-solution in methanol was used.

$$OHV = AV + \frac{(V_b - V_s) * N * 56.1}{W_s}$$

In this equation OHV = hydroxyl value (mg KOH/g), AV = acid value (mg KOH/g),  $V_b$  = volume of methanolic KOH solution needed to titrate the blank (mL),  $V_s$  = volume of methanolic KOH solution needed to titrate the sample (mL), N = normality of KOH solution (mol/L), 56.1 = molar mass of KOH (g/mol) and  $W_s$  = sample weight (g).

**Enzymatic activity assay.** The enzymatic activities of the immobilized Novozyme® 435 and SPRIN liposorb CALB were evaluated by the model esterification of lauric acid with 1-propanol in bulk (Figure S1)<sup>i</sup>. One unit of enzyme activity corresponds to the amount of enzyme preparation required to produce 1 micromole of propyl laurate per minute under standard conditions (60 °C).

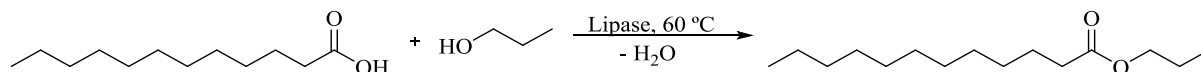

Figure S1 Esterification of lauric acid with 1-propanol in bulk.

In a 200 mL beaker, 24.0 g (0.12 mol) of lauric acid and 7.2 g (0.12 mol) of 1-propanol were mixed and melted at 60 °C. After taking the reference sample (blank), 200-300 mg of the enzyme was added to the mixture. The reaction solution was stirred at 60 °C for 20 min. A sample of the reaction mixture (100-180 mg) was taken every 5 min and dissolved in 7 mL of ethanol. To this solution, five drops of 0.1 w% phenolphthalein water/ethanol solution, used as indicator, were added. The decrease of the amount of lauric acid due to its enzymatic esterification was monitored via titration of the unreacted lauric acid with a 0.1 M ethanolic potassium hydroxide solution.

The activity U is calculated as the amount of micromoles propyl laurate formed in one minute by one gram of the enzyme, which was previously dried at 120 °C under reduced pressure for 24 h.

$$U = \frac{n_{lauric\ acid}}{m_{dry} \cdot t} \cdot \frac{AV_0 - AV_{sample}}{AV_0}$$

In this equation,  $n_{\text{lauric acid}}$  is the amount in moles of lauric acid used,  $t$  the reaction time for a certain sample,  $AV_0$  the acid value of the blank and  $AV_{\text{sample}}$  the acid value of the sample (mg KOH/g). The conversion of lauric acid was followed by AV measurements.

The activities showed to be 10700 and 16300 U ( $\mu\text{mol}\cdot\text{g}^{-1}\cdot\text{mol}^{-1}$ ) for Novozyme® 435 and SPRIN liposorb CALB, respectively. Thus, in order to achieve comparable activity for the polycondensation reactions, 10 wt% of Novozyme® 435 or 7 wt% of SPRIN liposorb CALB were employed.

Table S1. Molecular characterization of sorbitol-based polyesters with enhanced functionalities obtained by enzymatic polycondensation.

| Entry    | Monomers               | Sorbitol feed composition (mol%) | Sorbitol incorporated (mol%) | Potentiometric titration   |                             | <sup>31</sup> P NMR                                   |
|----------|------------------------|----------------------------------|------------------------------|----------------------------|-----------------------------|-------------------------------------------------------|
|          |                        |                                  |                              | AV (mg KOH/g) <sup>a</sup> | OHV (mg KOH/g) <sup>a</sup> | Ratio Sec. vs. Prim. OH of sorbitol unit <sup>b</sup> |
| <b>a</b> | AA + sorbitol + 1,8-OD | 5.0                              | 2.5                          | 11.4                       | 80.3                        | 11.1                                                  |
| <b>b</b> | DMA +                  | 5.3                              | 1.4                          | 0.0                        | 51.5                        | 6.7                                                   |
| <b>c</b> | sorbitol               | 10.5                             | 3.2                          | 0.0                        | 72.5                        | 9.7                                                   |
| <b>d</b> | +1,10-DD               | 15.8                             | 3.1                          | 0.0                        | 83.8                        | 9.7                                                   |

AA = adipic acid; DMA = dimethyl adipate; 1,8-OD = 1,8-octanediol; 1,10-DD = 1,10-decanediol; <sup>a</sup>: Data obtained by potentiometric titration performed after precipitation in MeOH. <sup>b</sup>: Ratio of secondary vs. primary hydroxyl groups of the sorbitol unit obtained by <sup>31</sup>P NMR after precipitation in MeOH.

Table S2. Solvent-cast coating formulations and related coating properties of poly(ester urethane)s based on sorbitol and 1,10-decanediol.

| Resin                                | OHV (mg KOH/g) | Film | Curing agent | Renewability (wt%) | Ratio NCO:OH | Acetone resistance <sup>a</sup> (d.r. 100) | Impact test <sup>a</sup> (1 kg,80 cm) | Av. Film thickness (μm) | Pencil hardness <sup>b</sup> |
|--------------------------------------|----------------|------|--------------|--------------------|--------------|--------------------------------------------|---------------------------------------|-------------------------|------------------------------|
| <b>c</b><br>DMA + sorbitol + 1,10-DD | 72.5           | F21  | DES          | 48                 | 1:1          | +                                          | +                                     | 25                      | 3B                           |
|                                      |                | F22  | DES          | 56                 | 0.8:1        | +                                          | +                                     | 22                      | 3B                           |
|                                      |                | F23  | DES          | 68                 | 0.5:1        | +/-                                        | +                                     | 21                      | 6B                           |
|                                      |                | F24  | IPDI         | 68                 | 1:1          | +                                          | +                                     | 16                      | 4B                           |
|                                      |                | F25  | IPDI         | 56                 | 0.8:1        | +/-                                        | +                                     | 23                      | 5B                           |
|                                      |                | F26  | DDI          | 98                 | 1:1          | +/-                                        | +                                     | 26                      | 5B                           |
|                                      |                | F27  | EELDI        | 97                 | 1:1          | +/-                                        | +                                     | 19                      | 5B                           |

DES: Desmodur N3600; IPDI: isophorone diisocyanate; DDI: dimer fatty acid diisocyanate; EELDI: ethyl ester L-lysine diisocyanate. <sup>a</sup>: + = good, +/- = moderate and - = poor. <sup>b</sup>: 6H to 2H = very hard to hard; H, F and B = moderate hard; 2B to 6B = soft to very soft.

Table S3. Molecular and thermal properties of the homopolyesters, *viz.* poly(octane adipate) and poly(decane adipate), synthesized *via* enzymatic polycondensation.

| Resin                | $M_n^a$<br>(kg/mol) | PDI <sup>a</sup> | OHV <sup>b</sup><br>(mg KOH/g) | $T_m^c$<br>(°C) | $\Delta H_m^c$<br>(J/g) | $T_c^d$<br>(°C) |
|----------------------|---------------------|------------------|--------------------------------|-----------------|-------------------------|-----------------|
| Poly(octane adipate) | 8.7                 | 2.1              | 19.0                           | 68              | 98                      | 50              |
| Poly(decane adipate) | 6.3                 | 1.7              | 30.7                           | 74              | 115                     | 55              |

<sup>a</sup>: Based on SEC measurements of the precipitated polyesters, performed in HFIP and using poly(methyl methacrylate) as standard; <sup>b</sup> Data obtained by potentiometric titration performed after precipitation in MeOH.

<sup>c</sup>: Data obtained *via* DSC from the second heating run; <sup>d</sup>: Data obtained *via* DSC from the cooling run.

Table S4. Thermal properties and crystallinity of the starting sorbitol-based polyester polyols and the related poly(ester urethane)s after curing.

| Resin                                      | OHV<br>(mg KOH/g) | Before curing   |                 |                         |                 |              | After curing |              |                 |                 |                         |                 |              |                  |
|--------------------------------------------|-------------------|-----------------|-----------------|-------------------------|-----------------|--------------|--------------|--------------|-----------------|-----------------|-------------------------|-----------------|--------------|------------------|
|                                            |                   | $T_g^a$<br>(°C) | $T_m^a$<br>(°C) | $\Delta H_m^a$<br>(J/g) | $T_c^b$<br>(°C) | $X^c$<br>(%) | Film         | Curing agent | Ratio<br>OH:NCO | $T_m^a$<br>(°C) | $\Delta H_m^a$<br>(J/g) | $T_c^b$<br>(°C) | $X^c$<br>(%) | Max<br>$X^d$ (%) |
| <b>c</b><br>DMA +<br>sorbitol +<br>1,10-DD | 72.5              | -20             | 67              | 100                     | 52              | 58           | FS12         | DES          | 1:1             | 59              | 70                      | 25              | 36           | 47               |
|                                            |                   |                 |                 |                         |                 |              | FS13         | DES          | 1:0.8           | 59              | 71                      | 25              | 42           | 49               |
|                                            |                   |                 |                 |                         |                 |              | FS14         | DES          | 1:0.5           | 46/65           | 15                      | 16/43           | 51           | 52               |
|                                            |                   |                 |                 |                         |                 |              | FS15         | IPDI         | 1:0.8           | 63              | 58                      | 26              | 55           | 52               |
|                                            |                   |                 |                 |                         |                 |              | FS16         | DDI          | 1:1             | 51              | 31                      | 15              | 31           | 39               |
|                                            |                   |                 |                 |                         |                 |              | FS17         | EELDI        | 1:1             | 54              | 46                      | 15              | 39           | 51               |

DES: Desmodur N3600; IPDI: isophorone diisocyanate; DDI: dimer fatty acid diisocyanate; EELDI: ethyl ester L-lysine diisocyanate.

<sup>a</sup>: Data obtained *via* DSC obtained from the second heating run. <sup>b</sup>: Data obtained *via* DSC from the cooling run. <sup>c</sup>: Crystallinity index from X-ray diffraction data is calculated using PeakFit. <sup>d</sup>: Maximum crystallinity calculated as:  $(\text{Mass polyester} * X_{\text{polyester before curing}}) / (\text{Mass polyester} + \text{Mass cross-linker})$ .

**Cross-link density calculation based on DMTA measurements.** The value of  $T_g$  extrapolated *via* DMA measurements is based on the response of a material to an applied oscillatory strain (or stress), and how that response varies with temperature, frequency, or both. The cross-link density was calculated according to the theory of rubber elasticity where the equilibrium elastic modulus is given by

$$\nu_e = \frac{G'}{RT} = \frac{E'}{3RT}$$

In this equation  $\nu_e$  is the cross-link density expressed in mole of elastically effective network chains per cubic meter of sample,  $G'$  is the shear storage modulus,  $E'$  is the elastic storage modulus,  $R$  is the universal gas constant ( $8.314 \text{ J K}^{-1} \text{ mol}^{-1}$ ) and  $T$  is the absolute temperature at which the experimental modulus is performed. Assuming that the samples do not undergo volume change with tensile strain,  $G'$  can be considered equal to  $E' / (2(1 + \nu))$  where  $\nu$  is the Poisson coefficient with a value of 0.5.

---

<sup>i</sup> Ferrario, V.; Veny, H.; De Angelis, E.; Navarini, L.; Ebert, C.; Gardossi, L. Lipases Immobilization for Effective Synthesis of Biodiesel Starting from Coffee Waste Oils *Biomolecules* **2013**, *3* (3), 514-534.
